# Supplementary material for: Zeaxanthin epoxidase is involved in the carotenoid biosynthesis and light-dependent growth of the marine alga Nannochloropsis oceanica
Source: PubMed Central journal article supplement (PMC10157934; doi:10.1186/s13068-023-02326-y), 2023-05-03
Supplement: 13068_2023_2326_MOESM1_ESM.pdf [file 13068_2023_2326_MOESM1_ESM.pdf]

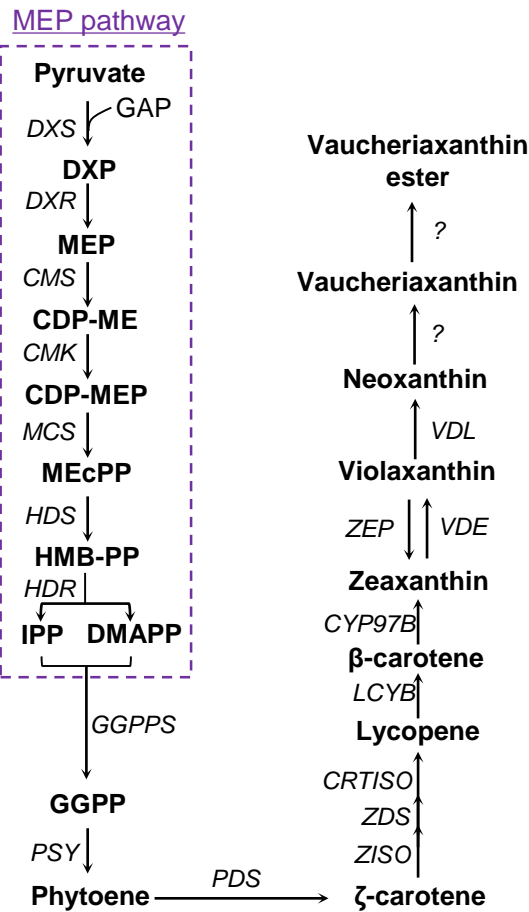

**Fig. S1** Proposed carotenoid biosynthetic pathways in *N. oceanica*. CDP-ME, 4-diphosphocytidyl-2-C-methylerythritol; CDP-MEP, 4-diphosphocytidyl-2-C-methyl-D-erythritol 2-phosphate; CMK, 4-diphosphocytidyl-2-C-methyl-D-erythritol kinase; CMS, 2-C-methyl-D-erythritol 4-phosphate cytidyltransferase; CRTISO, carotenoid isomerase; CYP97, cytochrome P450 beta-hydroxylase; DMAPP, dimethylallyl pyrophosphate; DXR, 1-deoxy-D-xylulose 5-phosphate reductoisomerase; DXP, 1-deoxy-D-xylulose 5-phosphate; DXS, 1-deoxy-D-xylulose 5-phosphate synthase; GAP, glyceraldehyde 3-phosphate; GGPP, geranylgeranyl diphosphate; GGPPS, geranylgeranyl diphosphate synthase; HDR, 4-hydroxy-3-methylbut-2-en-1-yl diphosphate reductase; HDS, 4-hydroxy-3-methyl-but-2-en-1-yl diphosphate synthase; HMB-PP, (E)-4-Hydroxy-3-methyl-but-2-enyl pyrophosphate; IPP, isopentenyl pyrophosphate; IPP1, isopentenyl-diphosphate Delta-isomerase; LCYB, lycopene beta cyclase; MCS, 2-C-methyl-D-erythritol 2,4-cyclodiphosphate synthase; MEcPP, 2-C-methyl-D-erythritol 2,4-cyclodiphosphate; MEP, 2-C-methylerythritol 4-phosphate; PDS, phytoene desaturase; PSY, phytoene synthase; VDE, violaxanthin de-epoxidase; VDL, violaxanthin de-epoxidase like; ZDS, zeta-carotene desaturase; ZEP, zeaxanthin epoxidase; ZISO, zeta-carotene isomerase

■ exon

— intron

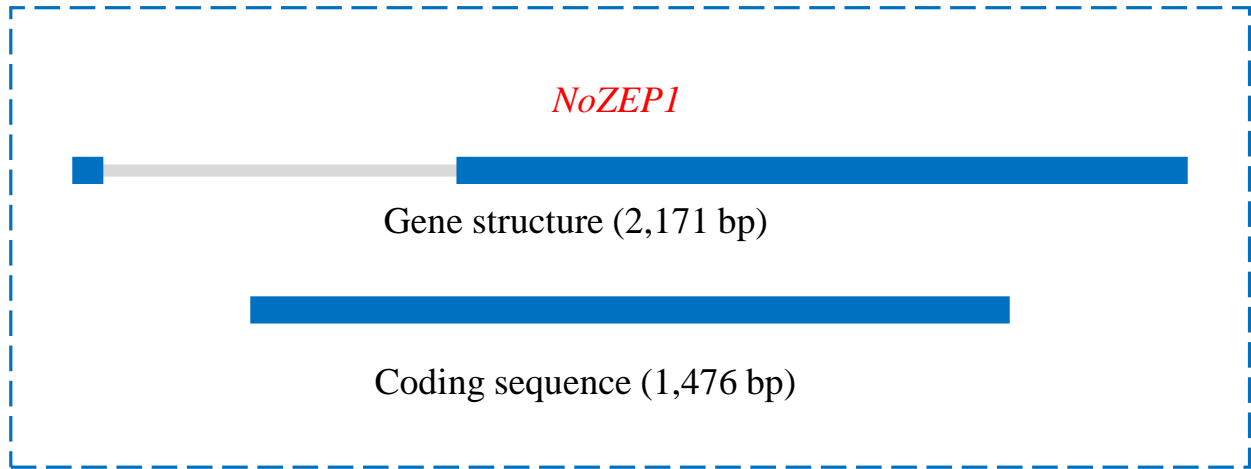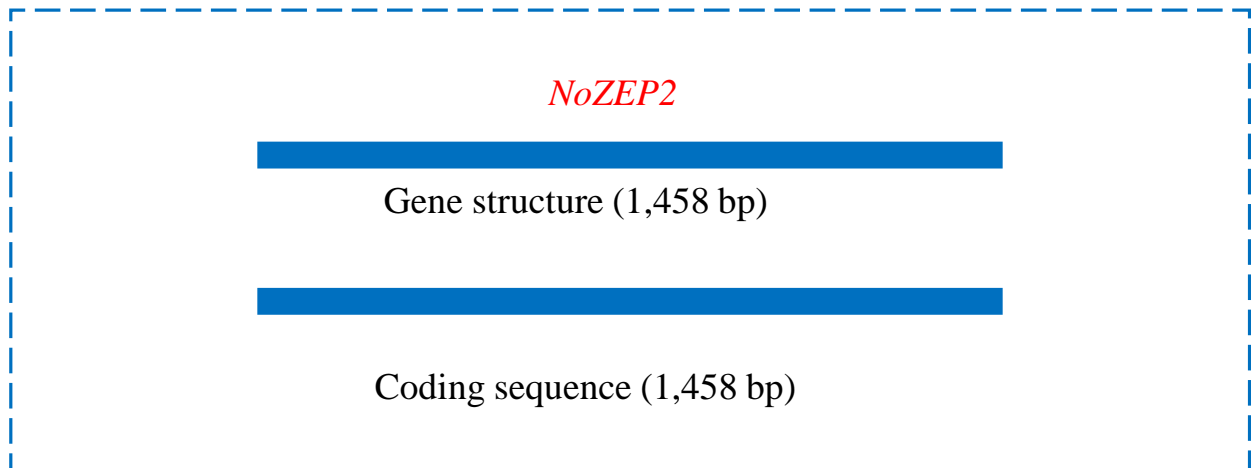

**Fig. S2** Gene structures of *NoZEP1* and *NoZEP2*

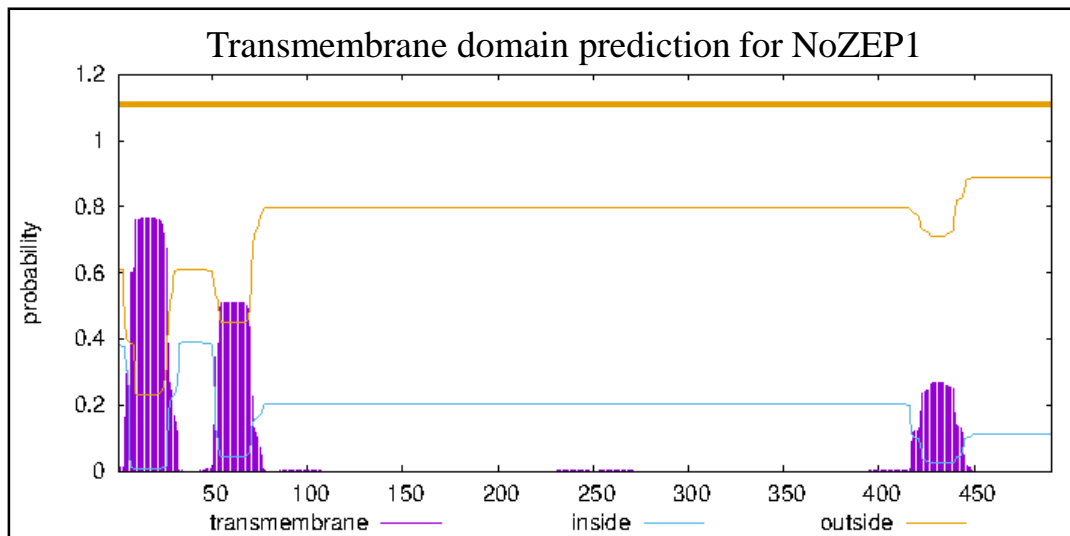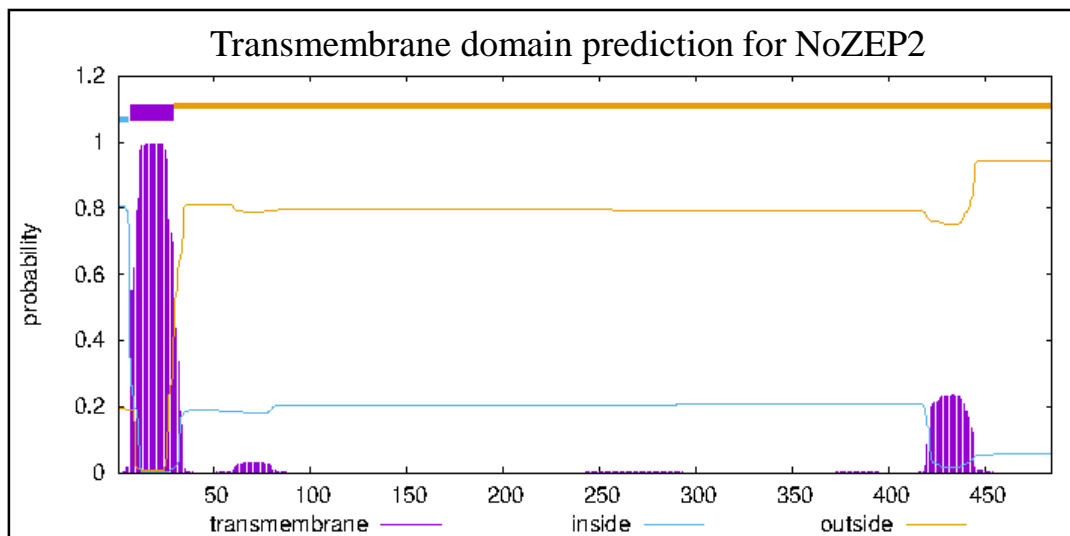

**Fig. S3** Transmembrane domains prediction for NoZEP1 and NoZEP2 by TMHMM (V2.0, <http://www.cbs.dtu.dk/services/TMHMM/>)

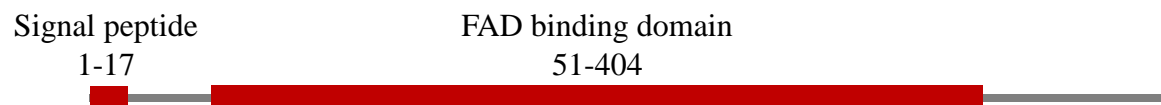

### **NoZEP1**

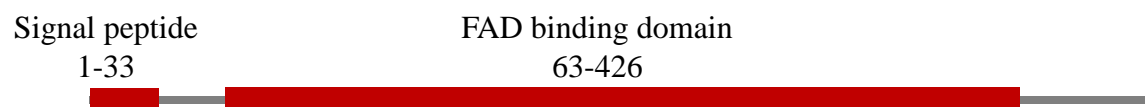

### **NoZEP2**

**Fig. S4** Predicted domains of NoZEP1 and NoZEP2 via SMART analysis (<http://smart.embl-heidelberg.de/>)

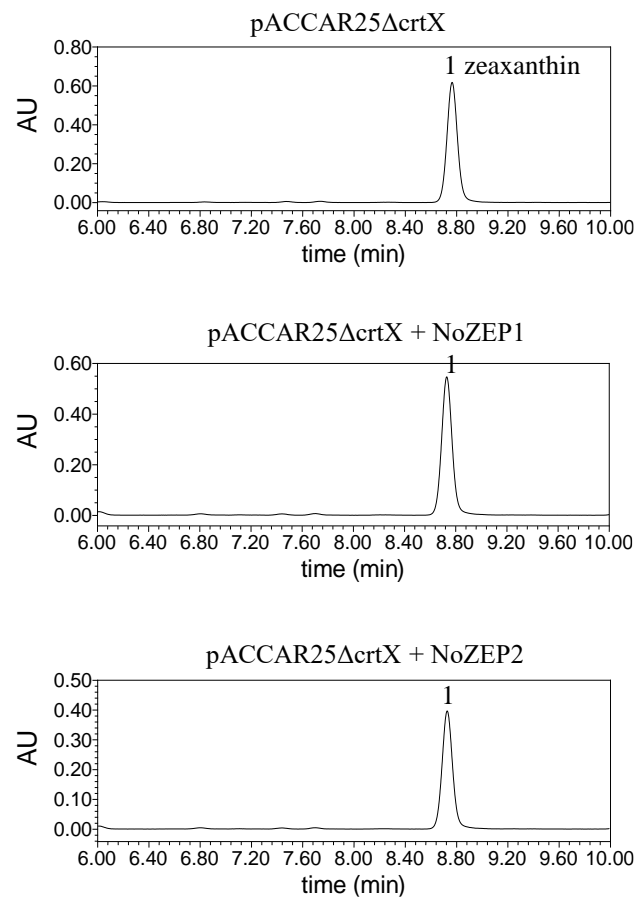

**Fig. S5** HPLC elution profiles of carotenoids produced in the zeaxanthin-producing *E. coli* strain without (top) or with *NoZEPs* (middle and bottom). The absorbance was recorded at 450 nm.

**HECTAR v1.3** (<https://webtools.sb-roscoff.fr/>)

| Protein id | Predicted targeting category | Signal peptide score | Signal peptide cleavage site | Chloroplast score | Mitochondrion score |
|------------|------------------------------|----------------------|------------------------------|-------------------|---------------------|
| NoZEP1     | Chloroplast                  | 0.8244               | 18                           | 0.7578            | -                   |
| NoZEP2     | Signal peptide               | 0.8271               | 34                           | 0.3599            | -                   |

**Cell-Ploc 2.0** (<http://www.csbio.sjtu.edu.cn/bioinf/Cell-PLoc-2/>)

| Protein id | Predicted location |
|------------|--------------------|
| NoZEP1     | Chloroplast        |
| NoZEP2     | Chloroplast        |

**Fig. S6** Subcellular localization predication for NoZEP1 and NoZEP2

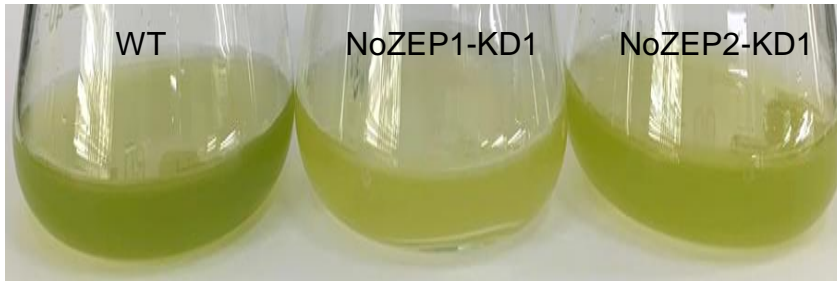

**Fig. S7** Cultures of WT and *NoZEP*-knockdown lines from two days of HL in Fig. 4

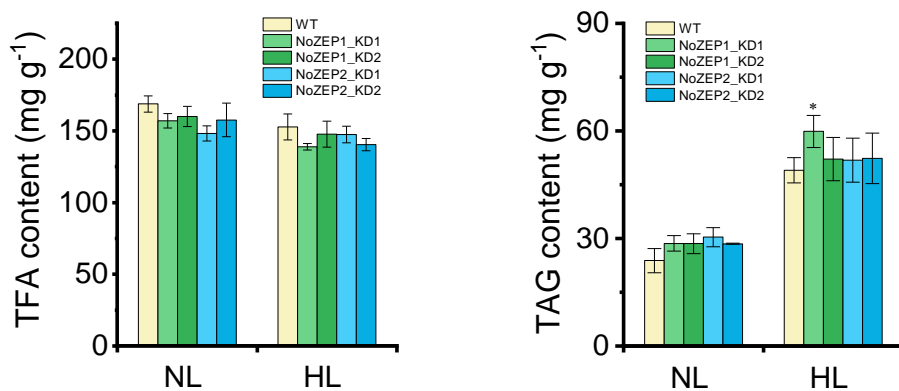

**Fig. S8** The content of TFA and TAG as affected by *NoZEP1* or *NoZEP2* knockdown in *N. oceanica* under NL and HL conditions. The NL and HL samples were from day 4 and day 2, respectively. Data represent mean values  $\pm$  SD ( $n = 3$ ). The asterisk indicates the significant difference (Student's *t*-test,  $P < 0.05^*$ ) between WT and knockdown lines.



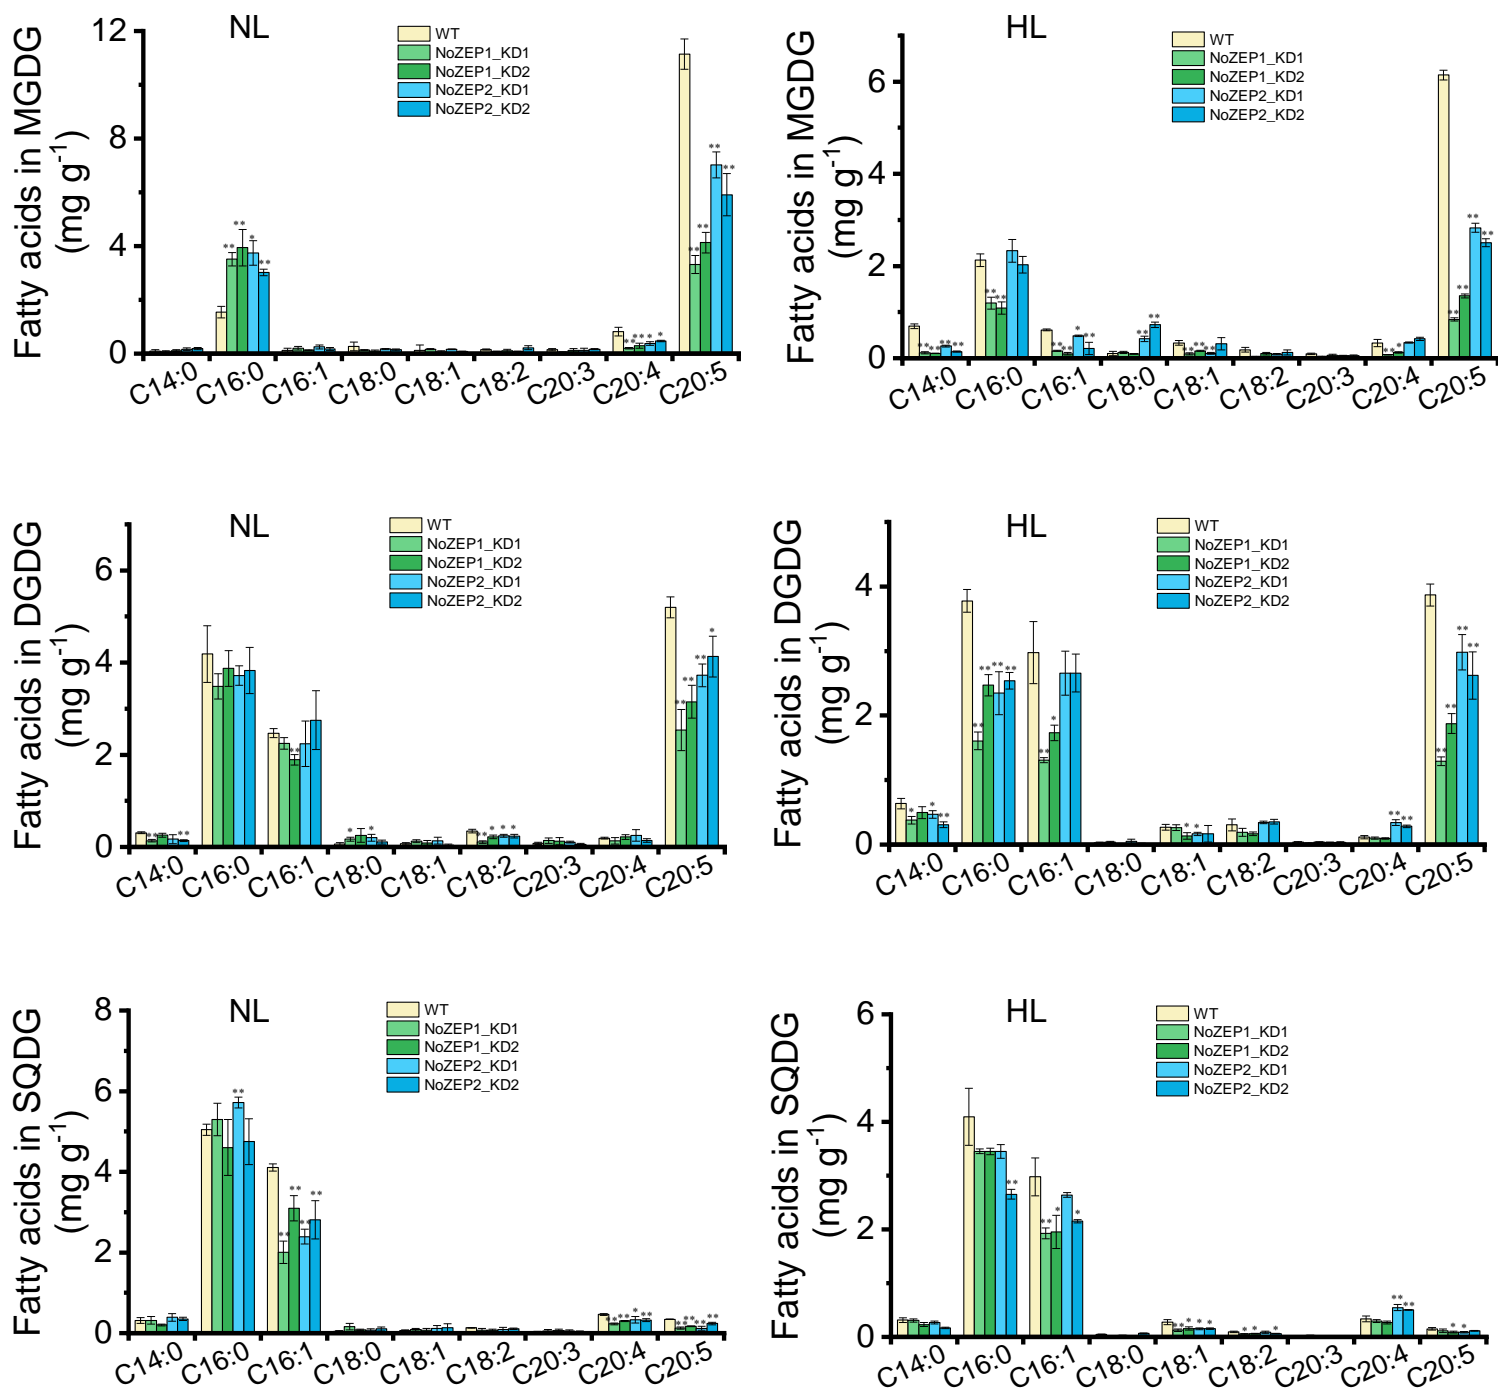

**Fig. S9** The content of individual fatty acids of MGDG, DGDG, and SQDG as affected by *NoZEP1* or *NoZEP2* knockdown in *N. oceanica* under NL and HL conditions. The NL and HL samples were from day 4 and day 2, respectively. Data represent mean values  $\pm$  SD ( $n = 3$ ). The asterisk indicates the significant difference (Student's *t*-test,  $P < 0.05^*$  or  $P < 0.01^{**}$ ) between WT and knockdown lines.

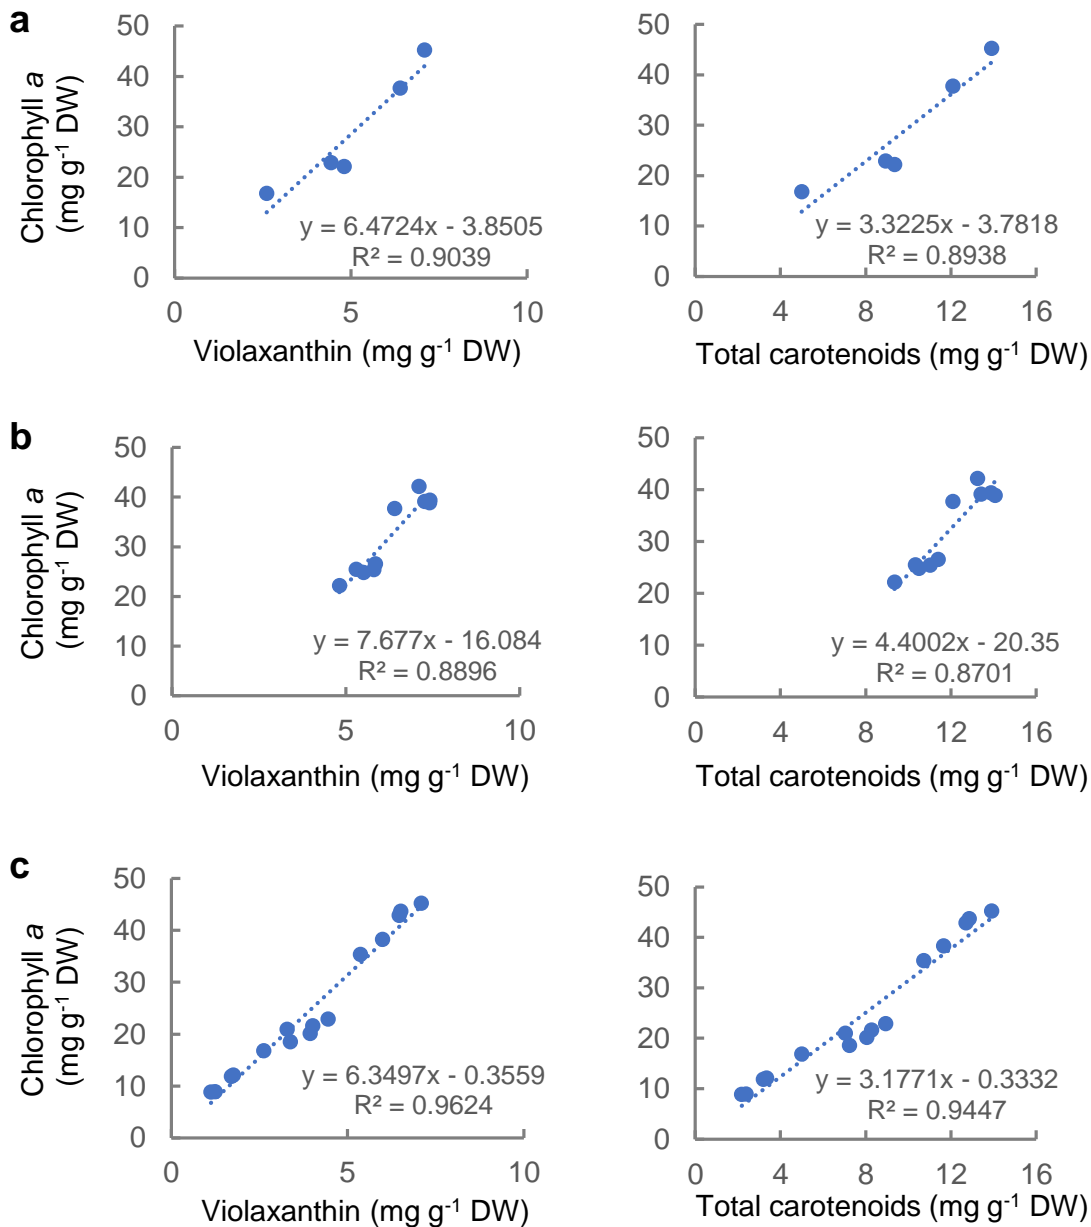

**Fig. S10** Correlation between chlorophyll *a* and violaxanthin and between chlorophyll *a* and total carotenoids in *N. oceanica*. (a) WT under different light conditions. Data were retrieved from Figs 3-5. (b) WT and overexpression lines. Data were retrieved from Fig. 3. (c) WT and knockdown lines. Data were retrieved from Figs 4 and 5.

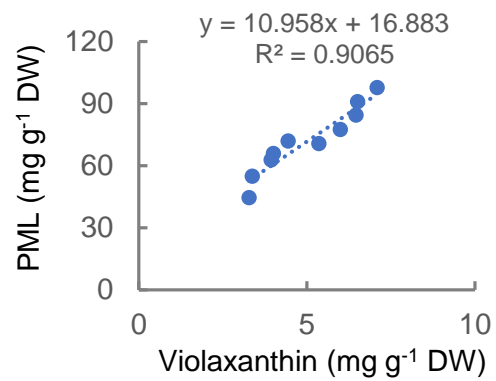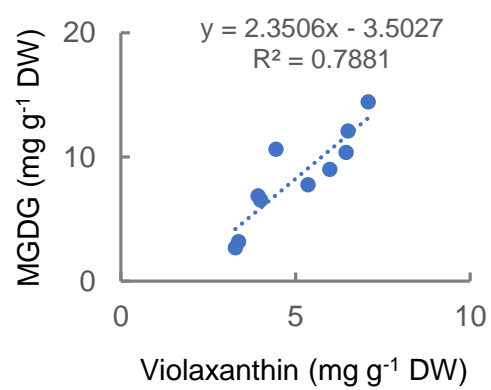

**Fig. S11** Correlation between membrane lipids and violaxanthin in *N. oceanica*. Data were retrieved from Figs 4 and 6. PML, polar membrane lipids.

**Vectors for *NoZEP1* and *NoZEP2* subcellular localization and overexpression**

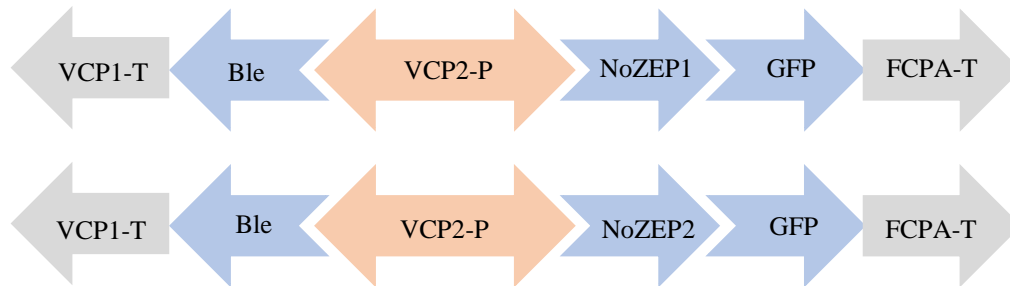

**Vectors for *NoZEP1* and *NoZEP2* knockdown**

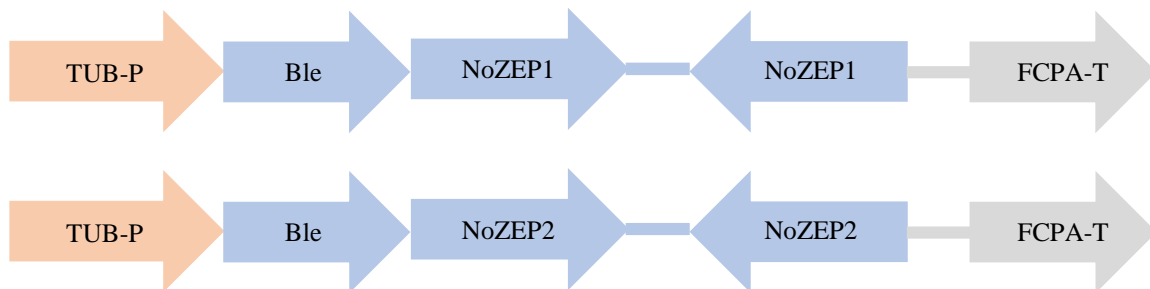

**Fig. S12** Illustration of vectors used in this study for *N. oceanica* transformation

**Table S1.** Primers used in the present study

| <b>Primer name</b>         | <b>Sequence (5' to 3')</b>                          | <b>Purpose</b>                                                         |
|----------------------------|-----------------------------------------------------|------------------------------------------------------------------------|
| NoZEP1-F1 ( <i>Bam</i> HI) | <u>taggatcc</u> ATGGTTCAGCTGGGGACTTTG               | Cloning NoZEP1 CDS into pUC19 vector                                   |
| NoZEP1-R1 ( <i>Eco</i> RI) | <u>cggaatc</u> CTAGACAGCAACCGTCTCTTT                |                                                                        |
| NoZEP2-F1 ( <i>Bam</i> HI) | <u>taggatcc</u> ATGACGGGTAGGAGAAGTGGT               | Cloning NoZEP2 CDS into pUC19 vector                                   |
| NoZEP2-R1 ( <i>Xho</i> I)  | <u>gactcgag</u> CATGAGGGGAAACATACGCCT               |                                                                        |
| NoZEP1-F2 ( <i>Kpn</i> I)  | accactctctcaagt <u>ggtacc</u> ATGGTTCAGCTGGGGACTTTG | Cloning NoZEP1 CDS into the overexpression vector and PCR verification |
| NoZEP1-R2 ( <i>Eco</i> NI) | accattcctcctcctcctccctaggGACAGCAACCGTCTCTTT         |                                                                        |
| NoZEP1-F3                  | GGGGGTCCGATTCAAGTGCA                                |                                                                        |
| NoZEP1-R3                  | TATAGGCAACCTCCTTCACG                                |                                                                        |
| NoZEP2-F2 ( <i>Kpn</i> I)  | accactctctcaagt <u>ggtacc</u> ATGACGGGTAGGAGAAGTGG  | Cloning NoZEP2 CDS into the overexpression vector and PCR verification |
| NoZEP2-R2 ( <i>Eco</i> NI) | accattcctcctcctcctccctaggCATGAGGGGAAACATACG         |                                                                        |
| NoZEP2-F3                  | CGGACCTGGAGCGTCGAGGC                                |                                                                        |
| NoZEP2-R3                  | ACACCACGAATGGCCTGATA                                |                                                                        |
| NoZEP1-F4 ( <i>Bam</i> HI) | <u>cgggatcc</u> TCGACCAGAGTCGTCTGCACAC              | Constructing the knockdown vector of NoZEP1                            |
| NoZEP1-R4 ( <i>Xba</i> I)  | <u>gctctaga</u> CGGTTCGTACAAATCCCTCTGGT             |                                                                        |
| NoZEP1-F5 ( <i>Xba</i> I)  | <u>gctctaga</u> TGCATTCGACCCTTCCCCACAT              |                                                                        |
| NoZEP1-R5 ( <i>Eco</i> RI) | <u>cggaatc</u> TCGACCAGAGTCGTCTGCACAC               |                                                                        |
| NoZEP2-F4 ( <i>Bam</i> HI) | <u>cgggatcc</u> ATGCGTAGCGACCTGTTACGCC              | Constructing the knockdown vector of NoZEP2                            |
| NoZEP2-R4 ( <i>Xba</i> I)  | <u>gctctaga</u> GCAGGCTTCGAACTTTCTGCAG              |                                                                        |
| NoZEP2-F5 ( <i>Xba</i> I)  | <u>gctctaga</u> GCCTGATAACCGGCATAGTTGG              |                                                                        |
| NoZEP2-R5 ( <i>Eco</i> RI) | <u>cggaatc</u> ATGCGTAGCGACCTGTTACGCC               |                                                                        |
| NoZEP1-F6                  | GGATTGCGTCTGACGTGTTG                                | RT-qPCR for NoZEP1                                                     |
| NoZEP1-R6                  | CAGAACCCAGTCGCTCTCA                                 |                                                                        |
| NoZEP2-F6                  | GCCACATGAATTCCGGTACAT                               | RT-qPCR for NoZEP2                                                     |
| NoZEP2-R6                  | CCGCAAGACAACCTCGGCTAT                               |                                                                        |
| NoActin-F                  | GCCGTTATTGGATGGATATG                                | RT-qPCR for NoActin                                                    |
| NoActin-R                  | ACAACAACCTCTCCTTCACA                                |                                                                        |
